# Supplementary material for: Re-enforcing hypoxia-induced polyploid cardiomyocytes enter cytokinesis through activation of β-catenin
Source: PubMed Central journal article supplement (PMC6883062; doi:10.1038/s41598-019-54334-4), 2019-11-28

**Re-enforcing hypoxia-induced polyploid cardiomyocytes enter cytokinesis through activation of  $\beta$ -catenin**

Yun-Han Jiang<sup>1</sup>, Yu Zhu<sup>1</sup>, Sai Chen<sup>1</sup>, Hai-Long Wang<sup>1</sup>, Yang Zhou<sup>2</sup>, Fu-Qin Tang<sup>1</sup>, Zhao Jian<sup>1</sup>, Ying-Bin Xiao<sup>1\*</sup>

1. Department of Cardiovascular Surgery, Xinqiao Hospital, Army Medical University, Chongqing, 400037, P.R. China; 2. Department of Cardiothoracic Surgery, the People's Hospital of Leshan, Leshan, Sichuan Province, 614000, P.R. China

\* Correspondence and requests for materials should be addressed to Y.B.X. (email: xiaoyb@tmmu.edu.cn)

Running title: Cytokinesis of polyploid cardiomyocytes

**Supplemental Figure S1. Active  $\beta$ -catenin promotes tetraploid CM cytokinesis by increasing the cytokinesis factors ECT2 expression.**

- (a) Location of the predicted  $\beta$ -catenin-regulated motif of *ECT2* gene.
- (b) The ChIP-qPCR result of two predicted motifs in CHIR9901-treated mice heart.
- (c) The ChIP-qPCR result of two predicted motifs in CHIR9901-treated NRCM.
- (d) Representative co-immunofluorescence with anti-ECT2, anti-Anillin and anti-cTnT antibodies. Scale bars, 5 $\mu$ m.
- (e) The percent of ECT2-positive and Anillin-positive NRCMs in both normoxic and hypoxic group (n=20 samples each).
- (f) The percent of ECT2-positive and Anillin-positive NRCMs among three groups (n=10 samples each).
- (g) Representative co-immunofluorescence with anti-ECT2, anti-MgcRacGAP and anti-cTnT antibodies. Scale bars, 5 $\mu$ m.
- (h) The percent of ECT2-positive and MgcRacGAP-positive NRCMs in both normoxic and hypoxic group (n=40 samples each).
- (i) The percent of ECT2-positive and MgcRacGAP-positive NRCMs across three groups (n=10 samples each).
- (j) qPCR analysis of cell cycle and cytokinesis genes normalized to actin (n=3 each).
- (k) Representative distribution ploidy of treated tetraploid NRCMs.
- (l) Ploidy of treated tetraploid NRCMs (n=3 for DMSO group, n=5 for  $\beta$ -catenin overexpression group). Data is presented as mean  $\pm$  s.d. \* P < 0.05.

**Supplemental Figure S2. Active  $\beta$ -catenin improve the cardiac function without increasing hypoxia-induced angiogenesis and inhibiting CM apoptosis.**

- (a) Immunofluorescence with anti-CD31 antibodies. Results are displayed as three representative images (upper, scale bars, 50 $\mu$ m), as three box plots of average capillary number per field (lower left, n=5 each), average capillary area per field (lower medium, n=5 each) and capillary number per cardiomyocytes (lower right, n=3 each), respectively.
- (b) Co-immunostaining with TUNEL staining and anti-cTnT antibodies in NRCMs. Results are displayed as three representative images (upper, scale bars, 50 $\mu$ m) and as two box plots of TUNEL-positive cardiomyocyte nuclei (lower left, n=4 samples each) and TUNEL-positive cardiomyocytes (lower right, n=4 samples each).
- (c) Co-immunostaining with TUNEL staining, WGA staining and anti-cTnT antibodies in adult mice. Results are displayed as three representative images (upper, scale bars, 50 $\mu$ m) and as two plot charts of TUNEL-positive cardiomyocyte nuclei (lower left, n=3 each) and TUNEL-positive cardiomyocytes (lower right, n=3 each).
- (d) Representative tracings of left-ventricular steady-state pressure-volume loops.
- (e) Ejection fraction of left ventricular among three groups (n=10 each). Data is presented as mean  $\pm$  s.d. \* P < 0.05.

**Supplemental Figure S3. Hypoxia may induce higher ploidy and nuclear number of cardiomyocytes in cyanotic congenital heart disease.**

- (a) The mean ploidy of cardiomyocyte nuclei between acyanotic and cyanotic group

- via fluorescence intensity measurement (n=3 each).
- (b) Distribution of cardiomyocyte ploidy (n=3 each).
- (c) Correlation between mean nuclear number of cardiomyocytes and arterial oxygen saturation in congenital heart disease samples.
- (d) Correlation between mean ploidy of cardiomyocyte nuclei and arterial oxygen saturation in both acyanotic and cyanotic groups together.
- (e) Correlation between mean ploidy of cardiomyocytes and arterial oxygen saturation in both groups together. Data is presented as mean  $\pm$  s.d. \* P < 0.05.

**Supplemental Figure S4. Ploidy and nuclear number of cardiomyocytes is higher in hypoxic heart.**

- (a) Representative distribution of ploidy of cardiomyocyte nuclei in both normoxic and hypoxic group.
- (b) The percent of polyploid cardiomyocyte nuclei between normoxic and hypoxic group (n=4 each).
- (c) The mean ploidy of cardiomyocyte nuclei via flow cytometry (n=4 each).
- (d) Distribution of cardiomyocyte ploidy (n=3 each). Data is presented as mean  $\pm$  s.d. \* P < 0.05.

**Supplemental Figure S5. Hypoxia induce higher ploidy and nuclear number of neonatal rat cardiomyocytes.**

- (a) The percent of polyploid neonatal rat cardiomyocyte nuclei between normoxic and hypoxic group (n=9 samples each).
- (b) The mean ploidy of cardiomyocyte nuclei via fluorescence intensity measurement (n=9 samples each).
- (c) Distribution of neonatal rat cardiomyocyte ploidy in both groups (n=18 samples each). Data is presented as mean  $\pm$  s.d. \* P < 0.05.

**Supplemental Figure S6. Active  $\beta$ -catenin increase the number of cardiomyocytes under hypoxia condition *in vitro* and *in vivo*.**

- (a) The OD value of CCK-8 in both normoxic and hypoxic group (n=3 each).
- (b) The OD value of CCK-8 across three groups (n=3 each).
- (c) Complete isolated cardiomyocyte count per heart in both normoxic and hypoxic group (n=4 each).
- (d) Complete isolated cardiomyocyte count per heart across three groups (n=4 each).
- (e) The ratio of heart weight to body weight (HW/BW) in both normoxic and hypoxic group (n=4 each).
- (f) HW/BW across three groups (n=8 each).
- (g) The ratio of heart weight to tibial length (HW/TL) in both normoxic and hypoxic group (n=4 each).
- (h) HW/TL across three groups (n=8 each). Data is presented as mean  $\pm$  s.d. \* P < 0.05.
- (i) The rate of spontaneous contraction (n=6 each). Data is presented as mean  $\pm$  s.d. \*P < 0.05.

**Supplemental Figure S7. Active  $\beta$ -catenin is unable to change the relative weight of lung.**

- (a) The ratio of lung weight to body weight (LW/BW) in both normoxic and hypoxic group (n=4 each).
- (b) The ratio of lung weight to tibial length (LW/TL) in both normoxic and hypoxic group (n=4 each).
- (c) LW/BW across three groups (n=8 each).
- (d) LW/TL across three groups (n=8 each). Data is presented as mean  $\pm$  s.d. \* P < 0.05.

**Supplemental Figure S8. Hypoxia induces angiogenesis, increases apoptosis and reduce cardiac function.**

- (a) Immunofluorescence with anti-CD31 antibodies. Results are displayed as two representative images (upper, scale bars, 50 $\mu$ m), as three box plots of average capillary number per field (lower left, n=9 each), average capillary area per field (lower medium, n=9 each) and capillary number per cardiomyocytes (lower right, n=3 each), respectively.
- (b) Co-immunostaining with TUNEL staining and anti-cTnT antibodies in NRCMs. Results are displayed as two representative images (upper, scale bars, 50 $\mu$ m) and as two box plots of TUNEL-positive cardiomyocyte nuclei (lower left, n=4 samples each) and TUNEL-positive cardiomyocytes (lower right, n=4 samples each).
- (c) Co-immunostaining with TUNEL staining, WGA staining and anti-cTnT antibodies in adult mice. Results are displayed as two representative images (upper, scale bars, 50 $\mu$ m) and as two plot charts of TUNEL-positive cardiomyocyte nuclei (lower left, n=3 each) and TUNEL-positive cardiomyocytes (lower right, n=3 each).
- (d) Representative tracings of left-ventricular steady-state pressure-volume loops.
- (e) Ejection fraction of left ventricular in both normoxic and hypoxic group (n=16 each). Data is presented as mean  $\pm$  s.d. \* P < 0.05.

**Supplemental Figure S9. Anillin and ECT2 dislocated in hypoxic cardiomyocytes.**

- (a) The schematic diagram of dynamic location of ECT2, Anillin and actomyosin during cardiomyocyte cytokinesis under normoxic and hypoxic condition.
- (b) Representative immunostaining image with anti-ECT2, anti-Anillin and anti-cTnT antibodies during anaphase. ECT2 and Anillin appear to accumulate at central spindle microtubules between two nuclei. Scale bars, 5 $\mu$ m.
- (c) Representative image during kataphase. ECT2 and Anillin locate at actomyosin constriction ring. Scale bars, 5 $\mu$ m.
- (d) Representative image during cytokinesis. ECT2 and Anillin located at intercellular bridge. Scale bars, 5 $\mu$ m.
- (e) Representative image of cytokinesis failure. ECT2 and Anillin fail to accumulate at actomyosin ring. Scale bars, 5 $\mu$ m.

**Supplemental Figure S10. The method for counting the cardiomyocyte nuclei.**

Nucleus only surrounding by Troponin T closely is defined as cardiomyocyte nucleus (white arrowhead). The nucleus defined as nonmyocyte nucleus is not completely

surrounded by Troponin T (□ and ○) or not closely surrounded by Troponin T (#) or is partly (Δ) or completely (white arrow) surrounded by cell membrane.

- (a) Scale bars, 10μm.
- (b) Scale bars, 5μm.
- (c) Scale bars, 5μm.
- (d) Scale bars, 50μm.

**Supplemental Figure S11. The method for measuring the ploidy and nuclear number of cardiomyocytes.**

- (a) The schematic flow diagram of detecting the distribution of multinucleated polyploid cardiomyocytes. The NRCM or the cardiomyocyte smear of animal model is stained by Hoechst, WGA and anti-cTnT antibodies, which marked the DNA, cytosol and membrane of myocyte, respectively.
- (b) Immunofluorescence image is captured via confocal laser scanning microscope (scale bars, 50μm).
- (c) According to the inclusion and exclusion criteria, the cardiomyocyte nucleus is defined by the relationship among nucleus, Troponin T and membrane.
- (d) The fluorescence intensity of Hoechst is detected to form the intensity curve.
- (e) The first curve peak is regard as diploid, and the second is regard as tetraploid, and so on. The intensity value of tetraploid need be about the two-fold one of diploid.
- (f) Based on ploidy curve, the ploidy of each nucleus can be identified.
- (g) The nuclear number of each cell can also be counted.
- (h) Considering the nuclear number of each cell, the distribution of multinucleated polyploid cardiomyocyte can be obtained.

**Supplemental Figure S12. The strategy of flow cytometry for the ploidy of isolated adult mice cardiomyocytes.**

- (a) According to the FITC-conjugated Troponin T (TnT) antibodies, the cardiomyocytes can be screened.
- (b) According to the intensity of DNA dye (Pyridine iodide for analysis or Hoechst for cell sorting), different ploidy of cardiomyocytes can be identified after the removal of cell adhesions.
- (c) Ploidy distribution of cardiomyocytes can be detected.

**Supplemental Figure S12. The strategy of flow cytometry for the ploidy of isolated adult mice cardiomyocytes.**

- (a) According to the FITC-conjugated Troponin T (TnT) antibodies, the cardiomyocytes can be screened.
- (b) According to the intensity of DNA dye (Pyridine iodide for analysis or Hoechst for cell sorting), different ploidy of cardiomyocytes can be identified after the removal of cell adhesions.
- (c) Ploidy distribution of cardiomyocytes can be detected.

**Supplemental Figure S13. Knocking down of ECT2 increases ploidy and nuclear number of neonatal rat cardiomyocytes with active  $\beta$ -catenin.**

(a) Distribution of ploidy of NRCM. Results are displayed as a representative hypoxic cardiomyocytes (upper), as a bar chart of ploidy of cardiomyocytes (lower left, n=4 samples each) and as a box plot of mean ploidy of cardiomyocytes (lower right, n=4 samples each). (b) The nuclear number of NRCMs. Results are displayed as a representative hypoxic image (upper, scale bars, 50 $\mu$ m), as a bar chart of multinucleated cardiomyocytes (lower left, n=37 samples for normoxia, n=28 samples for hypoxia, >30 cardiomyocytes from 9 randomly chosen fields were counted for each individual sample) and as a chart for mean nuclear number (lower right). (c) Distribution of ploidy (left, n=12 samples each) and mean ploidy (right, n=12 samples each, >30 cardiomyocytes from 9 randomly chosen fields were counted for each individual sample) of NRCMs. (d) The percent of Ki67-positive cardiomyocyte nuclei (left, n=9 samples each, >30 cardiomyocytes from 9 randomly chosen fields were counted for each individual sample) and Ki67-positive cardiomyocytes (left, n=9 samples each, >30 cardiomyocytes from 9 randomly chosen fields were counted for each individual sample). (e) The percent of pH3-positive cardiomyocyte nuclei (left, n=8 samples each, >30 cardiomyocytes from 9 randomly chosen fields were counted for each individual sample) and pH3-positive cardiomyocytes (right, n=8 samples each, >30 cardiomyocytes from 9 randomly chosen fields were counted for each individual sample). (f) The percent of Aurora B-positive cardiomyocyte nuclei (left, n=8 samples each, >30 cardiomyocytes from 9 randomly chosen fields were counted for each individual sample) and Aurora B-positive cardiomyocytes (right, n=8 samples each, >30 cardiomyocytes from 9 randomly chosen fields were counted for each individual sample). (g) The percent of mklp2-positive cardiomyocyte nuclei (left, n=8 samples each, >30 cardiomyocytes from 9 randomly chosen fields were counted for each individual sample) and mklp2-positive cardiomyocytes (right, n=8 samples each, >30 cardiomyocytes from 9 randomly chosen fields were counted for each individual sample). Data is presented as mean  $\pm$  s.d. \* P < 0.05.

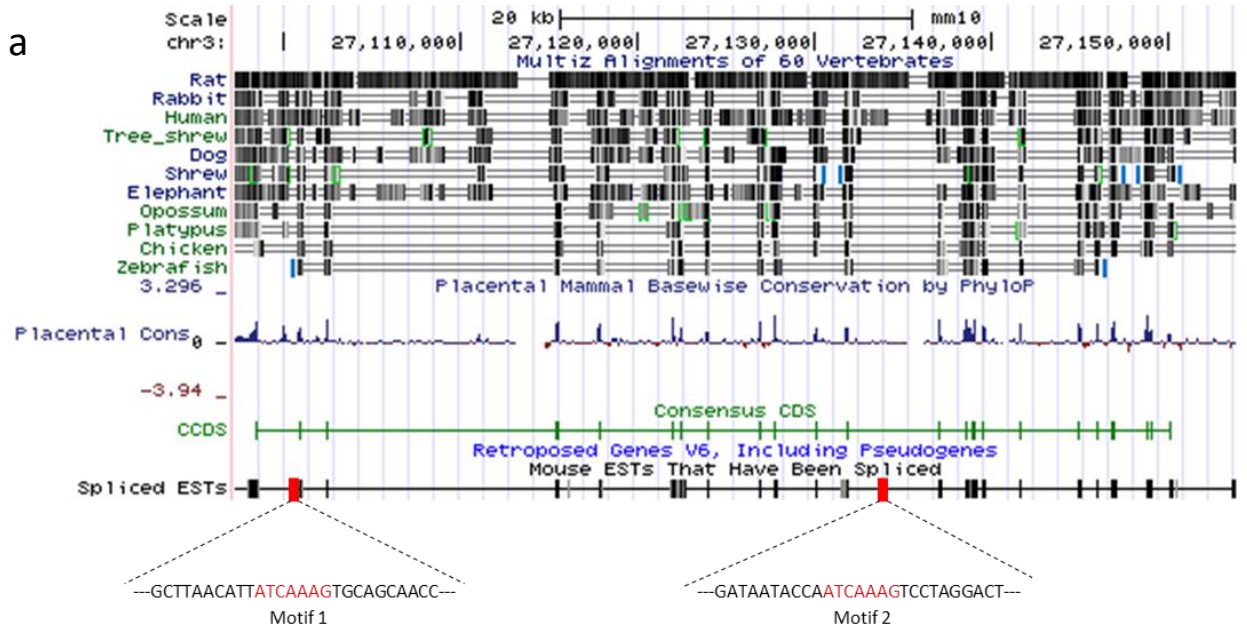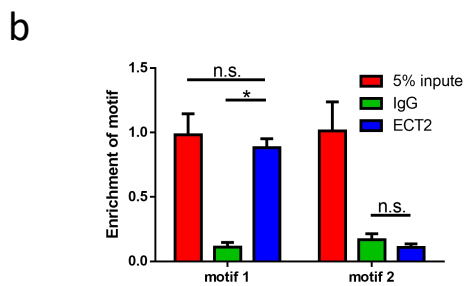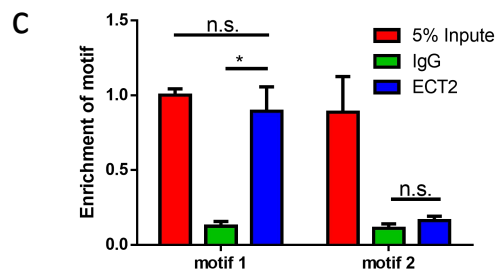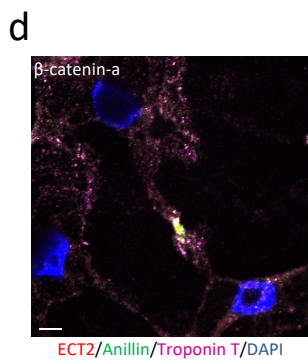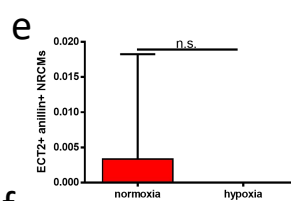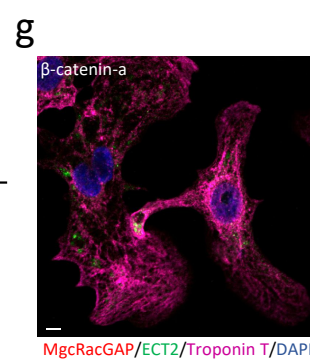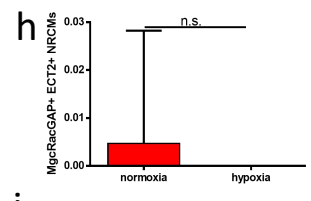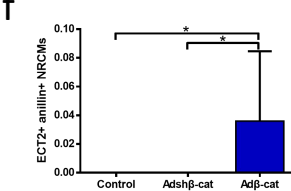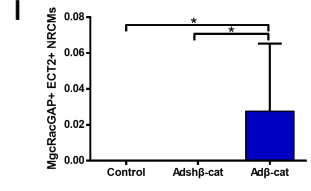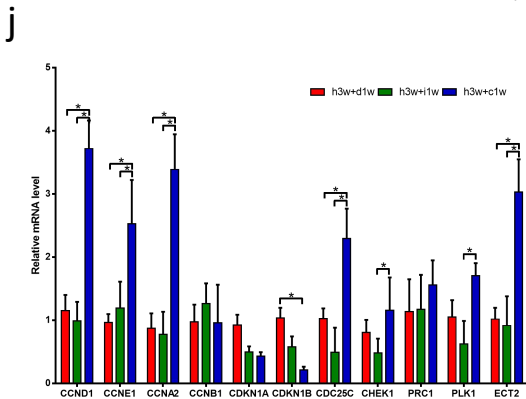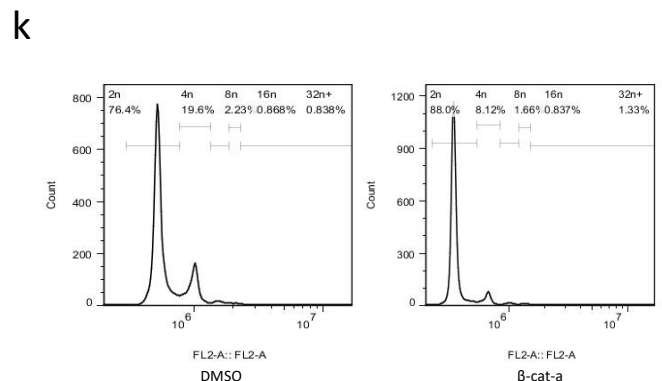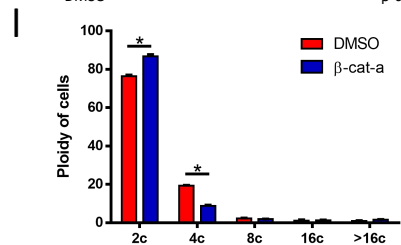

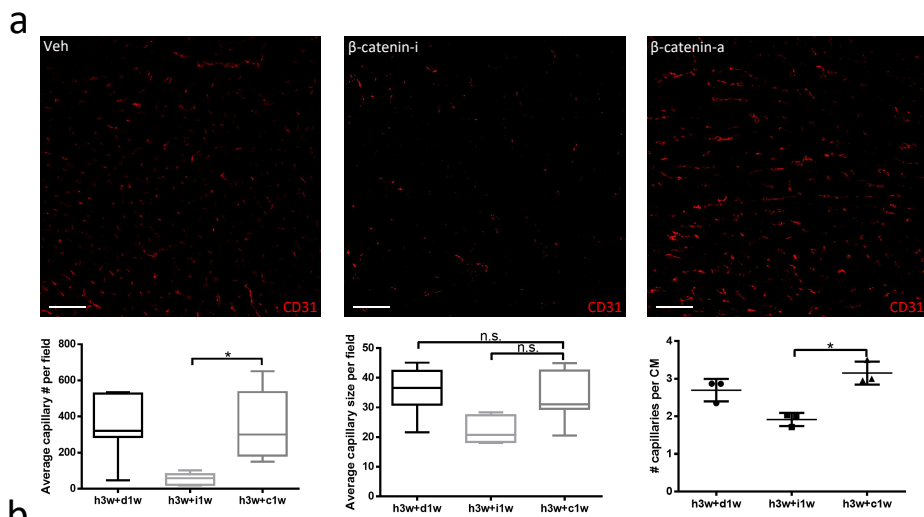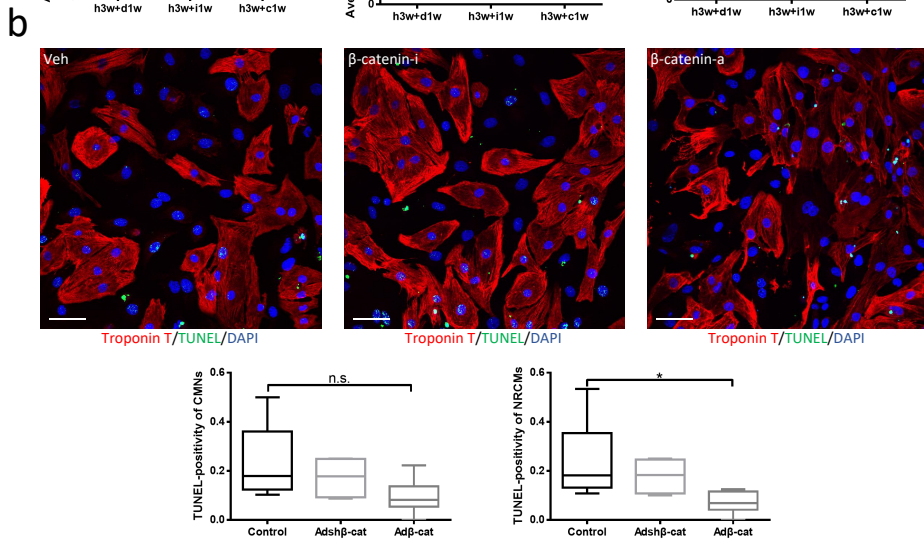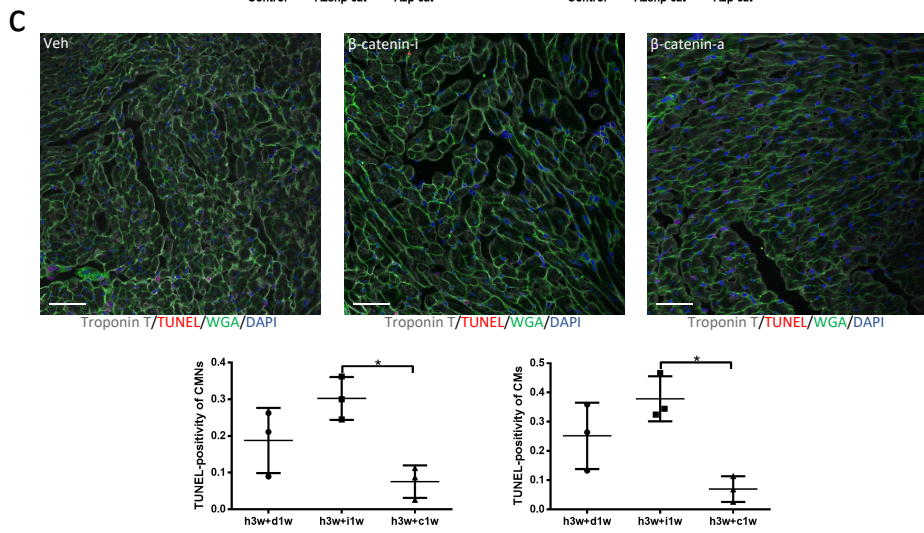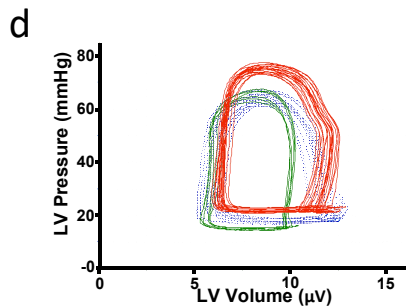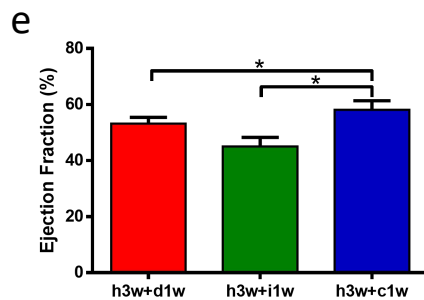



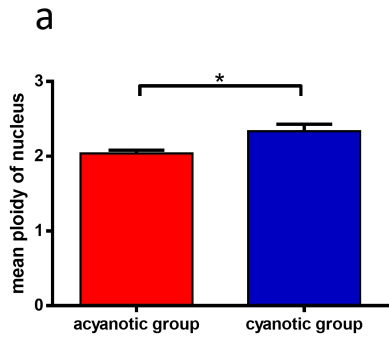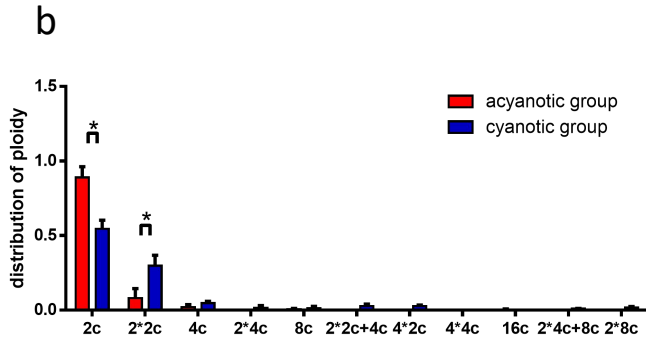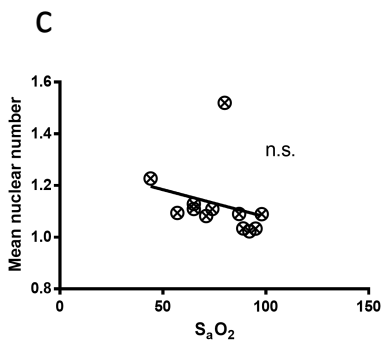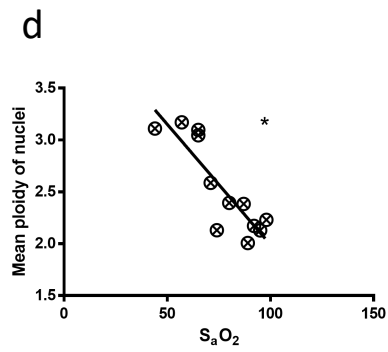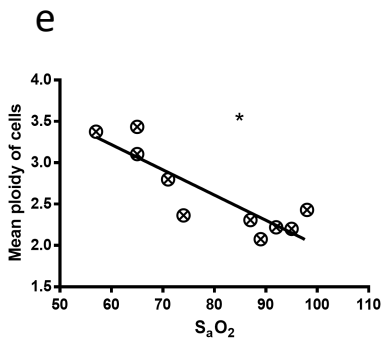

a

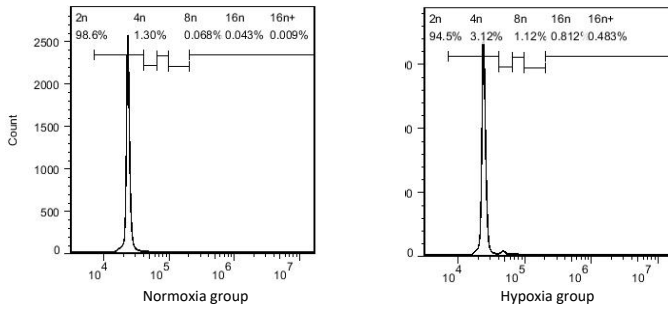

b

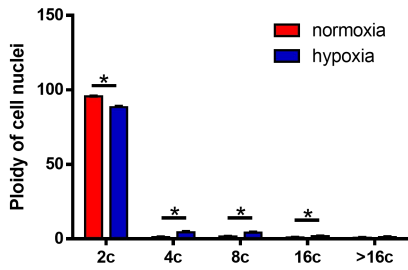

c

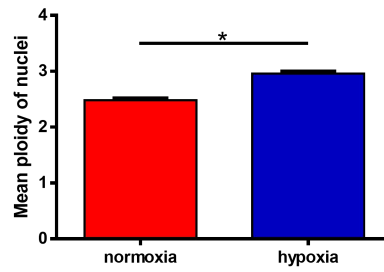

d

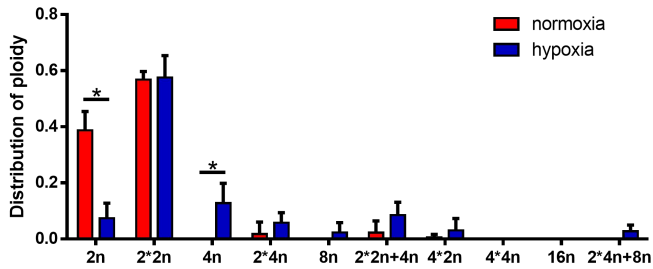

a

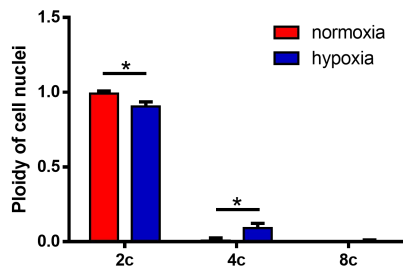

b

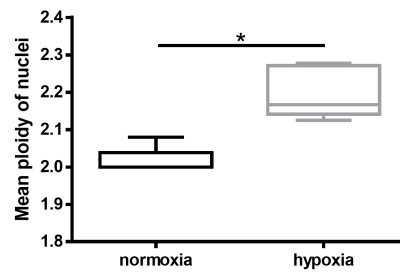

c

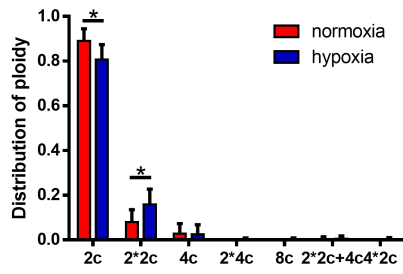

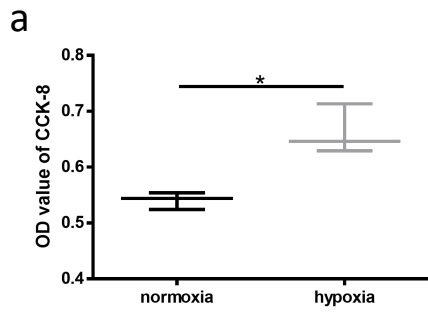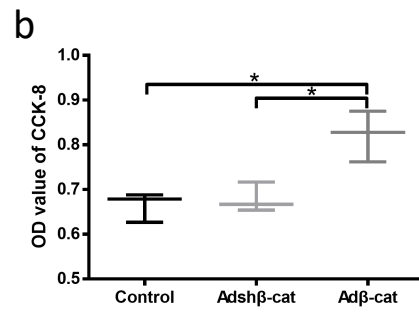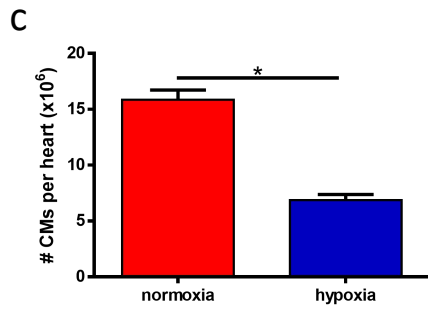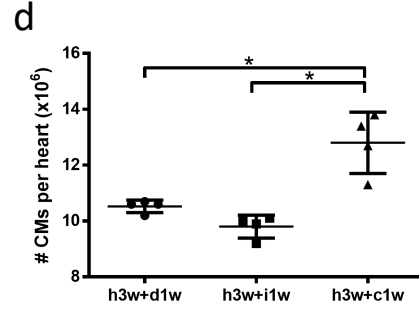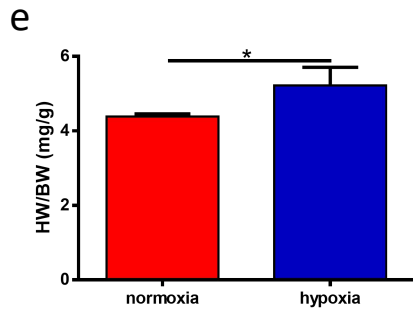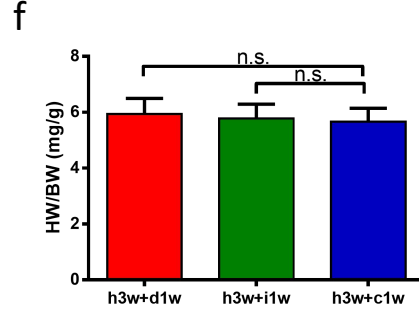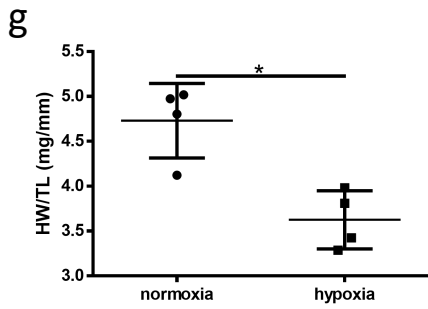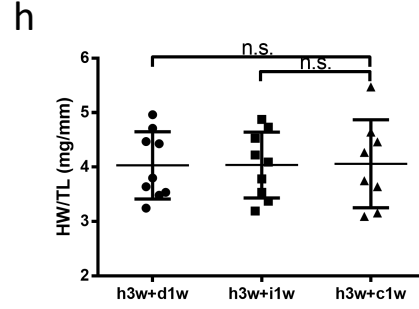

a

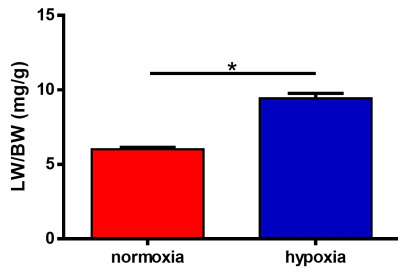

b

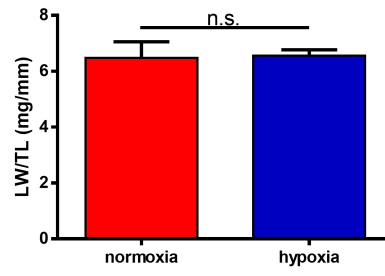

c

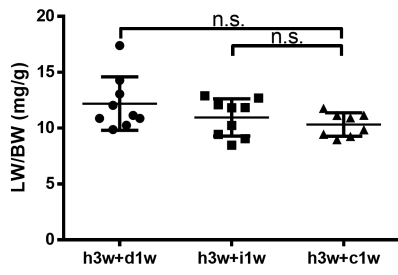

d

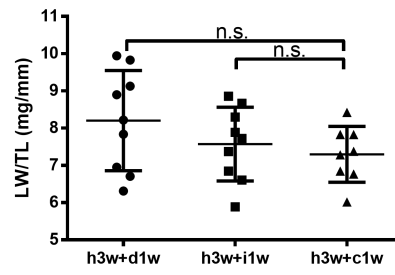

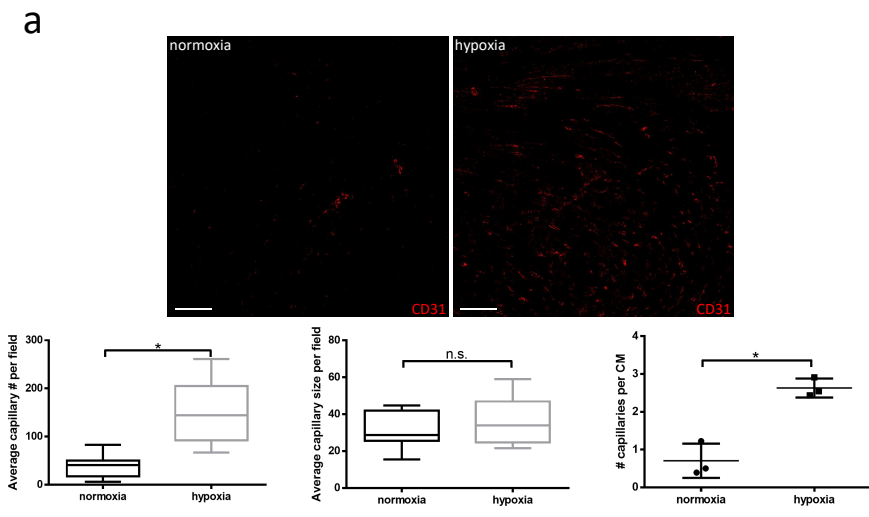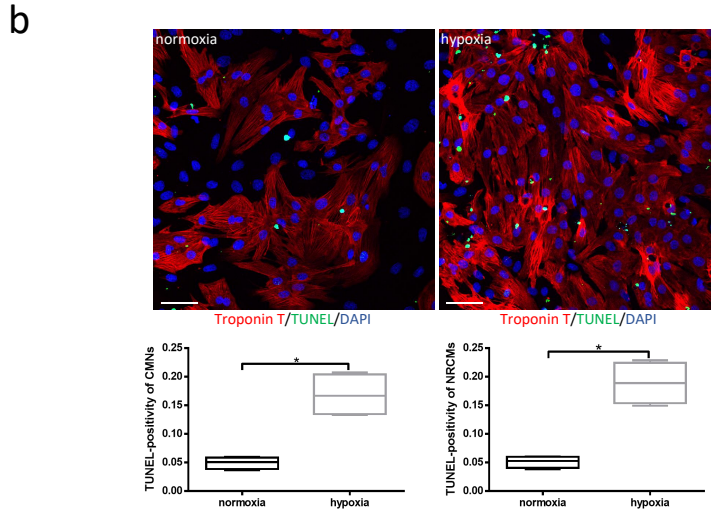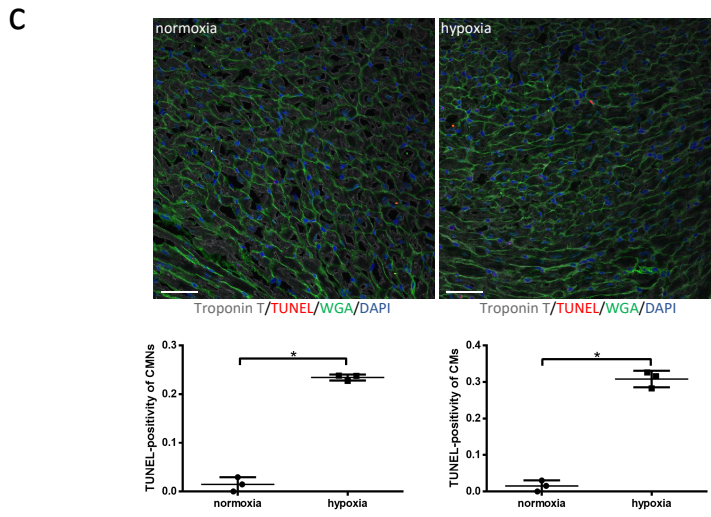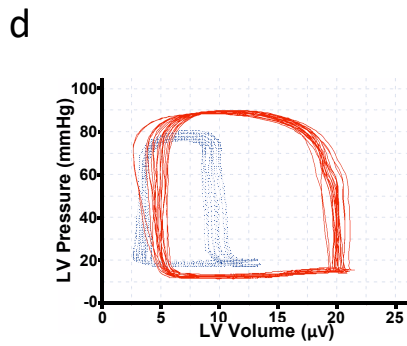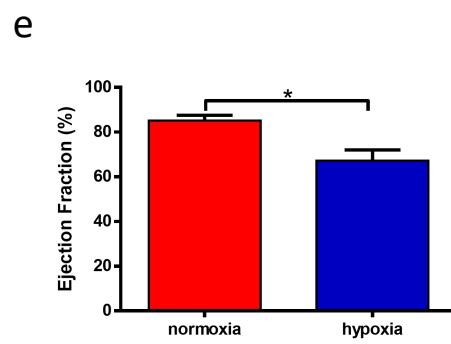

a

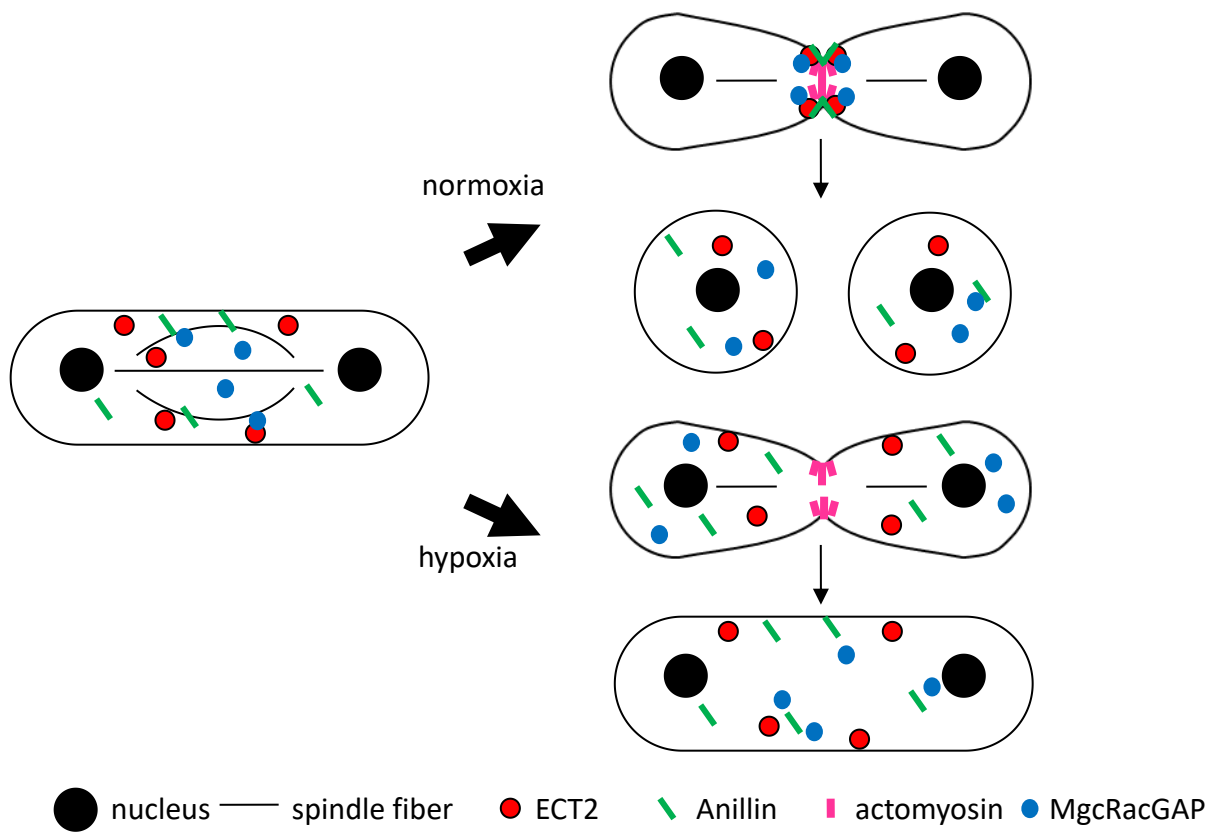

b

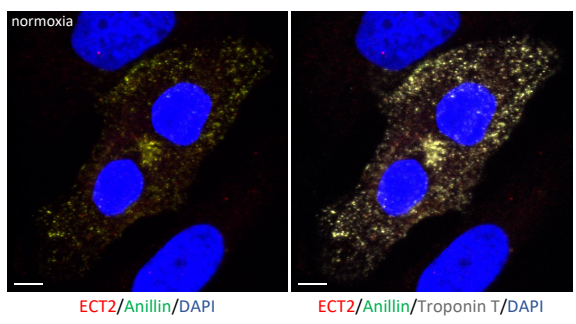

c

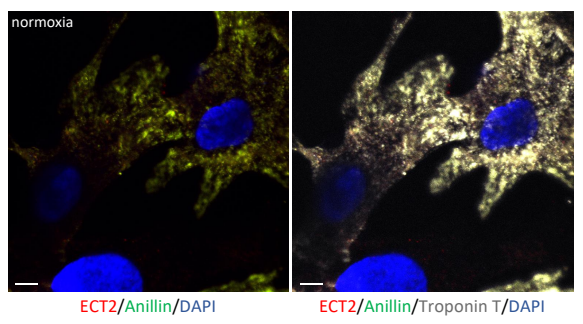

d

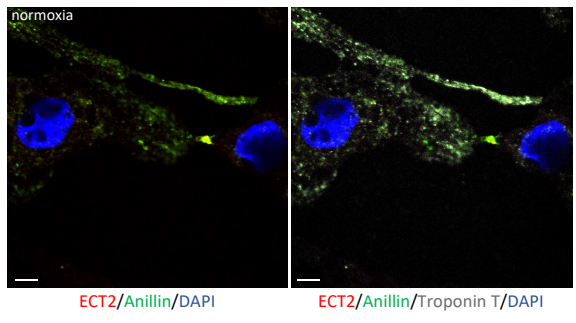

e

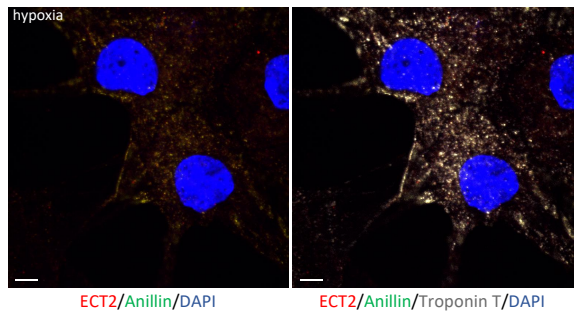

a

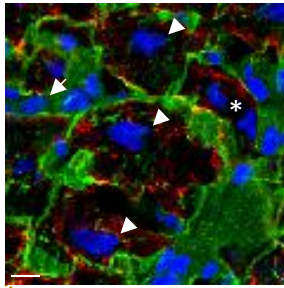

1600X, 10 $\mu$ m

b

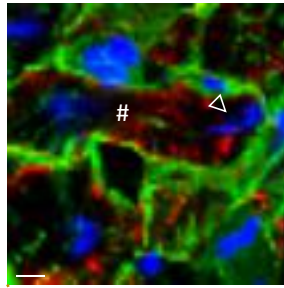

3200X, 5 $\mu$ m

c

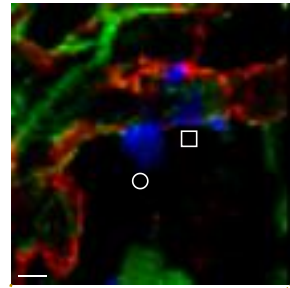

3200X, 5 $\mu$ m

d

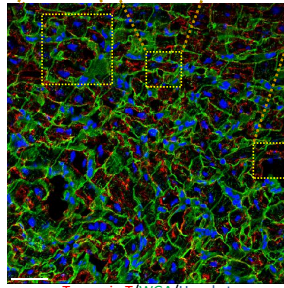

Troponin T/WGA/Hoechst



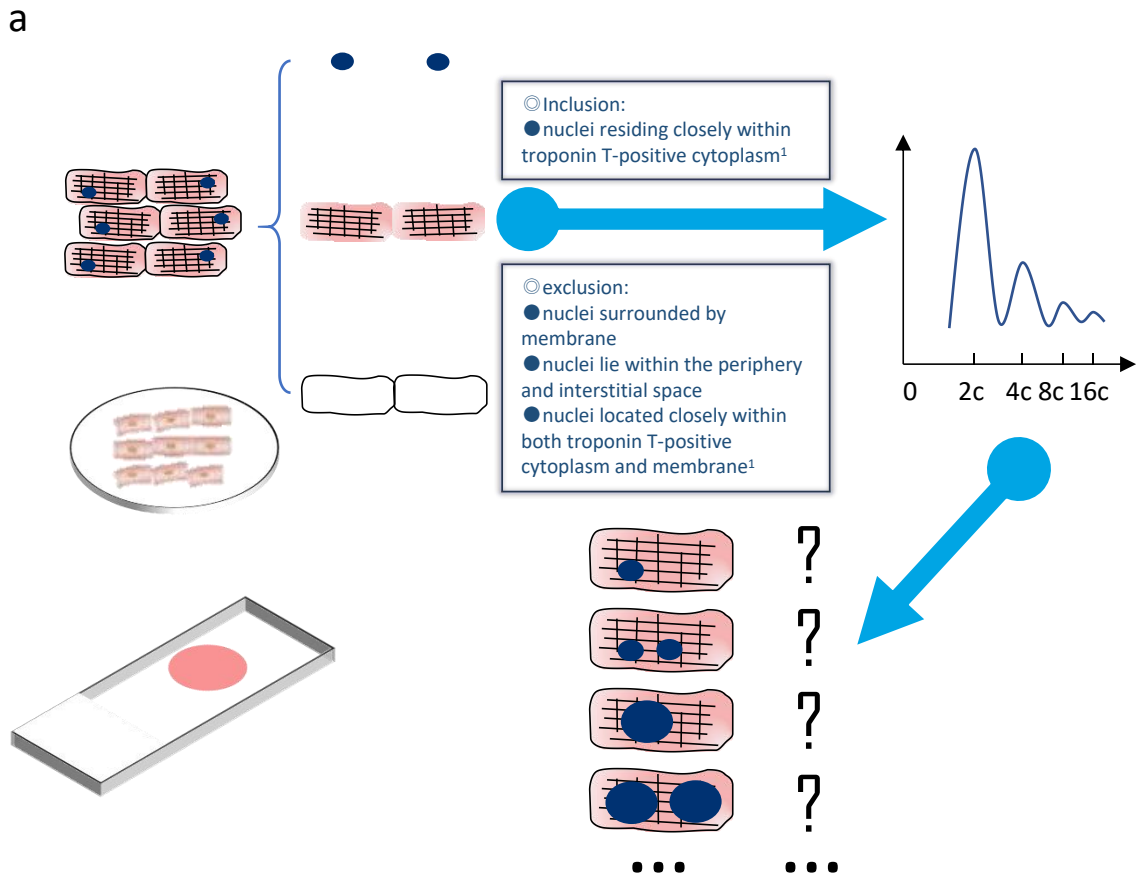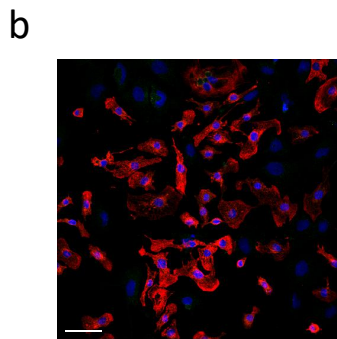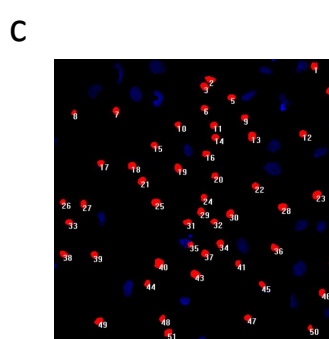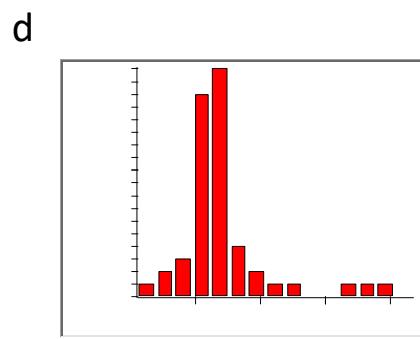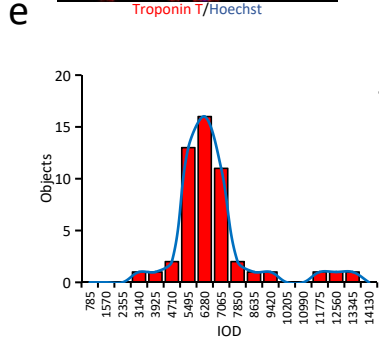

**f**

| Ploidy of nuclei | Counts |
|------------------|--------|
| 2c               | 48     |
| 4c               | 3      |

**g**

| Nuclear number | Counts |
|----------------|--------|
| Nu=1           | 49     |
| Nu=2           | 2      |

**h**

| Distribution of ploidy | Counts |
|------------------------|--------|
| 2c                     | 46     |
| 2*2c                   | 2      |
| 4c                     | 3      |
| 2*4c                   | 0      |
| 8c                     | 0      |

**a**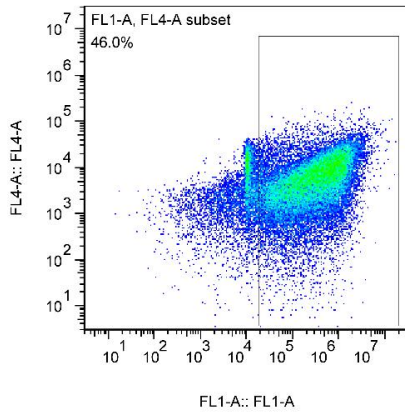**b**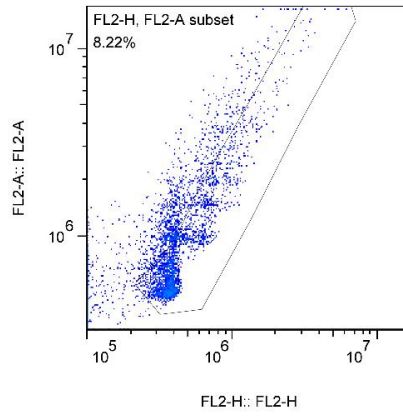**c**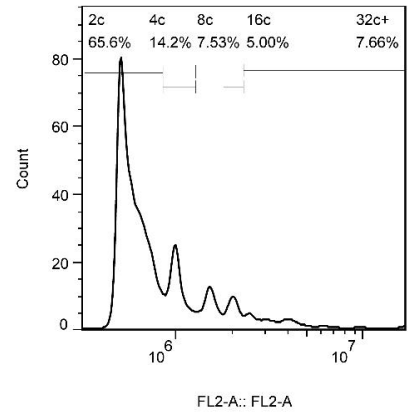

Supplementary Table I

|                                          | Acyanotic group | Cyanotic group | P value |
|------------------------------------------|-----------------|----------------|---------|
| N                                        | 10              | 10             |         |
| Age                                      | 6.65±8.83       | 3.52±3.6       | >0.05   |
| Gender (male/female)                     | 4/6             | 5/5            | >0.05   |
| Oxygen Saturation of Arterial Blood (%n) | 94.12±4.72      | 68.57±11.37    | <0.05   |

Supplementary Table II

| Gene   | FORWARD                     | REVERSE                     |
|--------|-----------------------------|-----------------------------|
| CCND1  | TGGATGCTGGAGGTCTGTGAGG      | GCAGGCGGCTCTTCTTCAAGG       |
| CHEK1  | CTCAGAGGTTCTCCACCAACTCATG   | CACATCTTGTTTCAGTAAGCGTTCACG |
| PRC1   | AGTCAGTTGTCACTTCTCTGTGTTCTG | ATGCTGCCATTGAGGTCCAAGTTC    |
| PLK1   | TGCGGCAAGAGGAGGCTGAG        | TCATTGTAGAGAATCAGGCGTGTGAG  |
| CDC25C | CCTCGAATGTGCCGTTCTCTGAG     | AGCCTGGTGGTCTGTTGAAG        |
| Cdkn1a | TCCTGGTGATGTCCGACCTGTTC     | CGGCGCAACTGCTCACTGTC        |
| CCNA2  | CACTGACACCTTTGACTATCCAATGG  | GTCTGGTGCCTTTCATGTAACC      |
| CCNE1  | CGTCCTGGATGTTGGCTGCTTAG     | CTATGTCGCCACTGATAACCTGAG    |
| CCNB1  | GCCTGAGCCTGAACCTGAACCTTG    | CATCATCTGCGTCTACGTCACTCAC   |
| Cdkn1b | CGGATGGACGCCAGACAAGC        | CTCTCCACCTCTGCCACTCG        |
| ECT2   | CGACAGCGTGTACCATCTCCTTC     | ATCCTGGACCATTATCACTTTGCTTC  |
| ACTB1  | ATCACTATTGGCAACGAGCGGTTTC   | CAGCACTGTGTTGGCATAGAGGTC    |

Supplementary Table III

| mice    | FORWARD                      | REVERSE                       |
|---------|------------------------------|-------------------------------|
| motif 1 | ACAACCTCCATTACTTTGTAAGCTAAGC | CAAGCTTGCTGTGAGCCGTC          |
| motif 2 | ATCTTGTTAGTTGATCAAGGTGTTTCA  | TCTTGGTTTAGTTATACTGTACCATAACC |
| rat     |                              |                               |
| motif 1 | TCCTGTTTCAGCCAGTACTTCCA      | AGAATTCAGGGAAGTGCTTCTAAAGA    |
| motif 2 | CCACAAGATGGCAGCAAACATT       | TGATGTCACCAAATCTCTCAATGCA     |

Supplementary Table IV

|                                 | Normoxia             | Hypoxia              | P value |
|---------------------------------|----------------------|----------------------|---------|
| N                               | 10                   | 10                   |         |
| CO ( $\mu\text{l}/\text{min}$ ) | 3367.55 $\pm$ 114.33 | 1547.33 $\pm$ 105.11 | <0.0001 |
| SV ( $\mu\text{l}$ )            | 16.28 $\pm$ 0.44     | 7.95 $\pm$ 0.54      | <0.0001 |
| Ves ( $\mu\text{l}$ )           | 3.89 $\pm$ 0.92      | 6 $\pm$ 0.14         | <0.0001 |
| Ved ( $\mu\text{l}$ )           | 19.43 $\pm$ 0.48     | 12.34 $\pm$ 0.47     | <0.0001 |
| HR (bpm)                        | 206.85 $\pm$ 4.08    | 194.76 $\pm$ 1.3     | <0.0001 |
| EF (%)                          | 84.76 $\pm$ 2.91     | 70.85 $\pm$ 6.52     | <0.0001 |
| Ea (mmHg/ $\mu\text{l}$ )       | 4.66 $\pm$ 0.17      | 9.06 $\pm$ 0.68      | <0.0001 |

Supplementary Table V

|                                 | H3w+D1w             | H3w+I1w            | H3w+C1w              | P value<br>(H3w+C1w<br>vs. H3w+D1w) | P value<br>(H3w+C1w<br>vs. H3w+I1w) |
|---------------------------------|---------------------|--------------------|----------------------|-------------------------------------|-------------------------------------|
| N                               | 10                  | 10                 | 10                   |                                     |                                     |
| CO ( $\mu\text{l}/\text{min}$ ) | 1262.33 $\pm$ 76.86 | 678.89 $\pm$ 71.92 | 1242.24 $\pm$ 100.89 | >0.05                               | <0.0001                             |
| SV ( $\mu\text{l}$ )            | 6.02 $\pm$ 0.35     | 4.52 $\pm$ 0.33    | 7.02 $\pm$ 0.5       | <0.0001                             | <0.0001                             |
| Ves ( $\mu\text{l}$ )           | 7.14 $\pm$ 0.17     | 6.46 $\pm$ 0.29    | 6.84 $\pm$ 0.36      | 0.002                               | 0.003                               |
| Ved ( $\mu\text{l}$ )           | 11.27 $\pm$ 0.47    | 9.73 $\pm$ 0.34    | 12.33 $\pm$ 0.46     | <0.0001                             | <0.0001                             |
| HR (bpm)                        | 209.65 $\pm$ 3.4    | 150.33 $\pm$ 11.69 | 177.03 $\pm$ 9.94    | <0.0001                             | <0.0001                             |
| EF (%)                          | 50.53 $\pm$ 3.48    | 45.04 $\pm$ 3.07   | 59.39 $\pm$ 3.76     | <0.0001                             | <0.0001                             |
| Ea (mmHg/ $\mu\text{l}$ )       | 11.74 $\pm$ 0.69    | 13.22 $\pm$ 1.03   | 8.31 $\pm$ 0.49      | <0.0001                             | <0.0001                             |

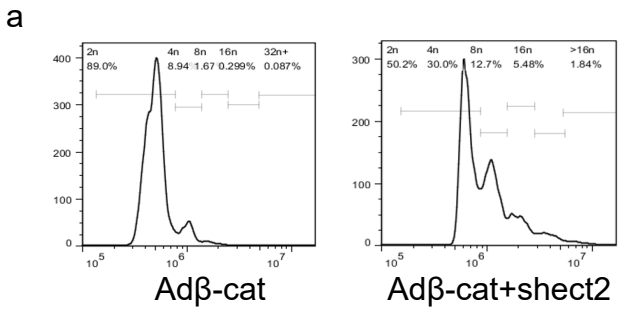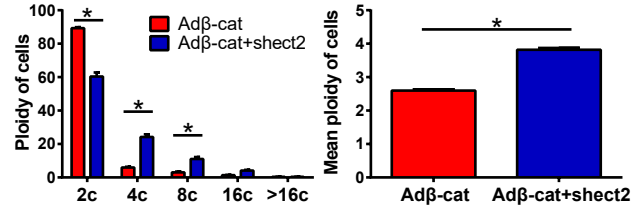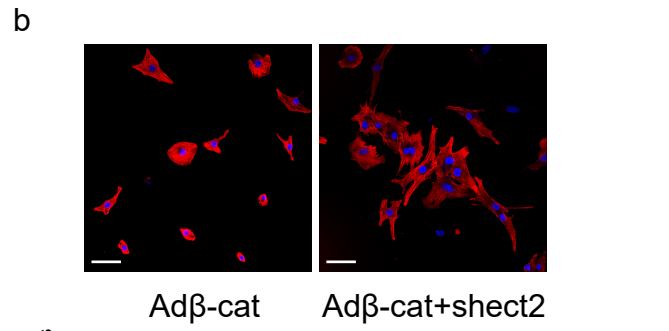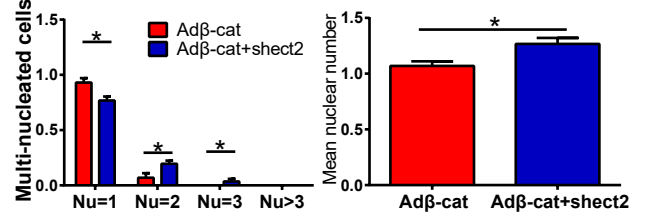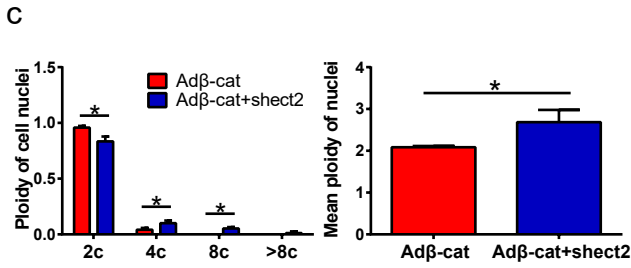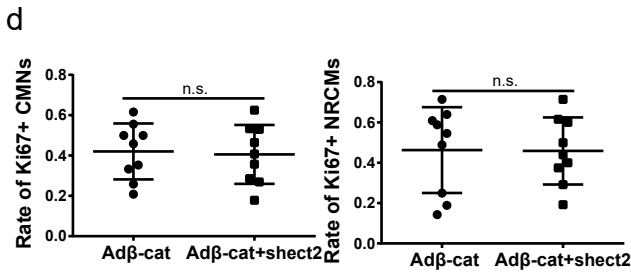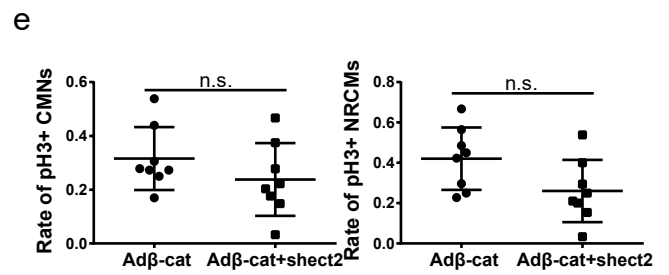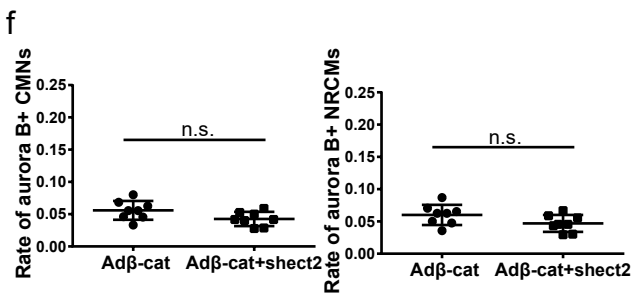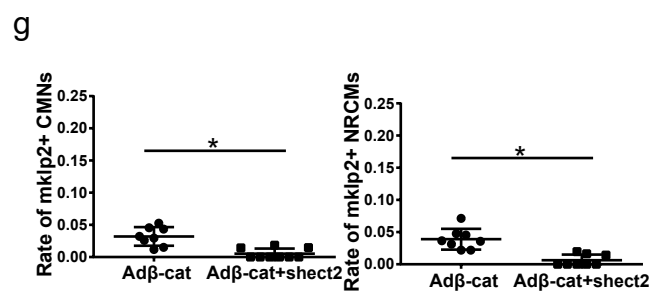

Supplement: 41598_2019_54334_MOESM1_ESM.pdf [file 41598_2019_54334_MOESM1_ESM.pdf]
